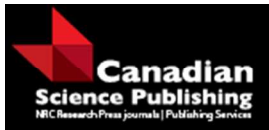

# Canadian Journal of Fisheries and Aquatic Sciences

Journal canadien des sciences halieutiques et aquatiques

## Predation of stocked masu salmon (*Oncorhynchus masou*) by riparian wildlife

|                                                            |                                                                                                                                                                                                                                       |
|------------------------------------------------------------|---------------------------------------------------------------------------------------------------------------------------------------------------------------------------------------------------------------------------------------|
| Journal:                                                   | <i>Canadian Journal of Fisheries and Aquatic Sciences</i>                                                                                                                                                                             |
| Manuscript ID                                              | Draft                                                                                                                                                                                                                                 |
| Manuscript Type:                                           | Article                                                                                                                                                                                                                               |
| Date Submitted by the Author:                              | n/a                                                                                                                                                                                                                                   |
| Complete List of Authors:                                  | Miyamoto, Kouta; National Research Institute of Fisheries Science, Japan<br>Fisheries Research and Education Agency<br>Squires, Theodore; Graduate school of Agriculture, Hokkaido University<br>Araki, Hitoshi; Hokkaido University, |
| Please Select from this Special Issues list if applicable: | N/A                                                                                                                                                                                                                                   |
| Keyword:                                                   | PREDATOR-PREY INTERACTION < General, hatchery management, wildlife, camera trap, body size                                                                                                                                            |
|                                                            |                                                                                                                                                                                                                                       |

SCHOLARONE™  
Manuscripts

1 **Predation of stocked masu salmon (*Oncorhynchus masou*) by riparian wildlife**

2 **Kouta Miyamoto, Theodore E. Squires, and Hitoshi Araki**

3

4 **K. Miyamoto.** National Research Institute of Fisheries Science, Japan Fisheries Research and  
5 Education Agency, Nikko, Tochigi 321-1661, Japan, and Graduate school of Agriculture,  
6 Hokkaido University, N9W9 Kita, Sapporo 060-8589, Japan

7 E-mail: mkouta@affrc.go.jp

8

9 **T. E. Squires.** Graduate school of Agriculture, Hokkaido University, N9W9 Kita, Sapporo  
10 060-8589, Japan

11 E-mail: squires@res.agr.hokudai.ac.jp

12

13 **H. Araki.** Research Faculty of Agriculture, Hokkaido University, N9W9 Kita, Sapporo 060-8589,  
14 Japan

15 E-mail: arakih@res.agr.hokudai.ac.jp

16

17 **Corresponding author:** Kouta Miyamoto, National Research Institute of Fisheries Science,  
18 Japan Fisheries Research and Education Agency, Nikko, Tochigi 321-1661, Tel.: +81 288 55  
19 0055; Fax.: +81 288 55 0064; E-mail: mkouta@fra.affrc.go.jp

## Predation of stocked masu salmon (*Oncorhynchus masou*) by riparian wildlife

K. Miyamoto, T. E. Squires and H. Araki

### Abstract

Predation after release is one of the major concerns of hatchery fish conservation and propagation. However, the relationship among the size of hatchery fish, the predator species, and their behaviors in natural environments is largely unknown. To understand the relationship, we conducted predation experiments in outdoor tanks and a semi-natural stream with exposure to local predators. Two different ranges of fork lengths of masu salmon (*Oncorhynchus masou*) were examined as prey sizes. Camera trap data showed that grey herons (*Ardea cinerea*) were the primary predator animal in the system, and that most herons utilized shallow areas in the morning or evening. Increasing the density of stocked salmon brought in more grey herons. More importantly, predation by grey herons resulted in the survival rate of larger salmon being significantly lower than that of the smaller salmon. Our results suggest that it is important to understand local predators, adjust the optimum body size of hatchery fish at release, and choose the appropriate stocking site and time of day for maximizing the effectiveness of fish stocking.

**Key words:** predator-prey interaction, hatchery management, wildlife, camera trap, body size

## Introduction

Predation by riparian wildlife is widely recognized as a key factor influencing the survival of fishes in stream ecosystems (Kruuk, 1995; Draulans 1987; Roby et al. 2003; Steinmetz et al. 2003). Salmonid fish populations reduced by riparian wildlife have been reported, not only for stocked populations, but also for wild populations (e.g. Osterback et al. 2013; Frechette et al. 2015). It is also noteworthy that stocked salmonids are often intensively preyed upon by birds (Wood, 1987; Martel & Dill, 1995; Harvey & Nakamoto, 2013) and mammals (Roberts & Garcia de Leaniz, 2011). Hatchery-reared salmonid fishes are routinely stocked in natural waterways as part of conservation efforts or stock enhancement (Brown and Laland 2003; Salvanes and Braithwaite 2006; Fraser 2008). Therefore, if we implement a management strategy that decreases local predation pressures, then effective conservation or stock enhancement methods should be improved.

Studies examining the predator-prey interaction between riparian animals and fish have been generally based on either investigating predation pressure of riparian animals without observing fish response (Draulans 1987; Post et al. 1998; Harvey & Nakamoto 2013) or investigating the mortality rate of fish without observing the behavior of predators (Penaluna et al. 2015). However, the predation effect is influenced by many factors: fish migration, predator species diversity, the number of predators present, and the duration of their sojourn (Gawlik, 2002, Steinmetz et al. 2003). Thus, methodological improvements which decrease predation

pressure on stocked fish require a profound understanding of both predator and prey behaviors. Additionally, as food size preference depends on predator species (Carss and Marquiss 1991) and the ability of fish to avoid predators depends on fish size (Dill & Fraser 1984), we need to consider the size effect of prey fish.

To evaluate the impacts of predation by riparian animals, it is necessary to evaluate the relationships among the predator species, their behaviors, and their preferred size of prey in a place that allows for free movement of all parties. However, the number of studies on this relationship is limited due to the difficulty in identifying species of predatory riparian animals and observing their predation behavior directly. These studies are further complicated due to complex behaviors exhibited by many predator species, such as individual movement for feeding and nesting needs (Collis et al., 2002), movement due to changes in prey densities (Kushlan, 1976; Gawlik, 2002), and movement resulting from human disturbance (Klein, 1993).

Recently, camera trapping that uses fixed cameras, triggered by infrared sensors, to ‘trap’ images of passing animals, provide the opportunity to collect information on animal behavior (Silveira et al. 2003; Wegge et al. 2004). Because camera trapping is a non-invasive technique, it causes minimal environmental disturbance (Henschel & Ray 2003; Silveira et al. 2003). In this study, we conducted a predation test using camera traps with outdoor experimental tanks and a semi-natural stream to investigate the relationships between the different predator species, their behavior, and the size of stocked salmon.

77

## 78 **Materials and Methods**

### 79 Test fish

80 The test fish used in the experiments were hatchery-reared masu salmon (*Oncorhynchus*  
81 *masou*) from the Shobu-shimizu River in Tochigi Prefecture, Japan (approximately 36°45'N,  
82 139°27'E). Eggs were obtained from mature adults that had migrated into the Shobu-shimizu  
83 River, and were handled according to standard hatchery procedures directed by the National  
84 Research Institute of Fisheries Science (NRIFS) facility at Nikko. Young of the year (YOY) ( $n =$   
85 305) and one year old (OYO) ( $n = 305$ ) salmon were employed in this study. The YOY and OYO  
86 salmon were selected from five rearing tanks (50 cm width  $\times$  120 cm length  $\times$  20 cm depth) and  
87 a large tank (3 m width  $\times$  1.5 m length  $\times$  0.9 m depth) respectively. The YOY fish used were  
88 75–100 mm fish (75–100 mm FL-group, hereafter) and the OYO used were 135–160 mm fish  
89 (135–160 mm FL-group, hereafter). Before the start of the study, fish were fed daily food rations  
90 (commercial trout pellets) equal to 1.5–2.0% of their estimated body weight.

91

### 92 Tank experiment

93 We conducted predation tests in four outdoor tanks for three days from August to  
94 September, 2013. Four FRP circular tanks (120-cm diameter  $\times$  15-cm high) at NRIFS in Nikko  
95 were used in a forested and grassy area and each had a thin layer of natural gravel (2–7-cm

gravel and about 13-cm cobble substrate) on the bottom (Fig. 1a). A 10-cm high and 8-cm roof fence that was installed on each tank both provided the fish with cover and prevented them from jumping out. A camera (Trophy Cam HD, Bushnell, Overland Park, KS, USA) was set in the south side of each tank to monitor the whole tank. The presence of cover and gravel substrate facilitated near natural behavior of the masu salmon, allowing hiding and escaping (Miyamoto 2016a), thus minimizing experimental stress. During the study period the stocked fish were fed daily food rations (commercial trout pellets) equal to around 2.0% of their body weight. Spring water,  $10.2 \pm 0.3^{\circ}\text{C}$  (mean  $\pm$  SD) was introduced into each aquarium at a rate of 6 L/min. Two different fork lengths (FL) of masu salmon were used as the size of prey fish, 75–100 mm FL-group (mean  $\pm$  SD,  $91.9 \pm 7.0$  mm) and 135–160 mm FL-group ( $145.8 \pm 6.8$  mm).

To evaluate the size-selective predation risk, 30 fish (15 from each FL-group) were placed in each tank. The number of fish of each FL-group that survived was counted each day. The survival rate of salmon was then compared between the two FL-groups. To identify the predator animals, the number of photos taken by camera trap (described in the section below) was counted.

Next, to investigate the relationship between the number of stocked salmon and the frequency in which predator animals appeared, three outdoor tanks were used. The test fish were divided into 10, 5, and 0 individuals and stocked randomly in each of the three tanks. Three days later, the number of photos of potential predators taken by camera trap (described in the section

below) was counted for each tank. This trial was replicated three times for each FL-group.

# Predation test in a semi-natural stream

The predation test was conducted for 20 days from August to September, 2013 using a semi-natural stream (mean  $\pm$  standard deviation [SD]: 120 m long, 95.8  $\pm$  4.3-cm wide; 2% gradient drain) in a forested and grassy area at NRIFS (Fig. 1b). The stream was constructed of stone, wood, and soil. Spring water, at 10.2  $\pm$  0.3°C (mean  $\pm$  SD) was drained at 18 L/s. The stream was forked to allow free passage into four 30 meter sections (Sec. 1-4 from upper to lower). Each section contained three pools and three riffles. The pools were about 80-cm long and about 60-cm wide with maximum depth of approximately 40-cm. Woody debris (c. 70-cm long and c. 20-cm wide) were placed in the sides of each pool. The riffles were 9–12-cm deep and contained a mixture of 2–7-cm gravel and about 13-cm cobble substrate. A 50-cm waterfall was built in the top of the stream with two metal gates (1-cm  $\times$  2-cm mesh) at the top to prevent fish from escaping. The water drain was separated by a metal mesh gate (1-cm  $\times$  2-cm mesh) with the bottom quarter of the gate covered with plastic mesh (8-mm  $\times$  8-mm mesh). A total of 400 fish (200 from each FL-group) were stocked in Sec. 2 after measuring their fork length and body weight. At the end of the study period, a backpack electrofishing unit (Smith-Root, Vancouver, WA, USA) was used to remove and count the fish that had survived. The electric shock was repeated until the fish count was zero twice in a row.

To investigate the distribution of salmon in the stream, the fish in each section were closed in by fish block nets (8-mm  $\times$  8-mm mesh) at the end of the experiment to prevent them from moving between the sections. When fish were caught by electrofishing, each fish was lightly anesthetized with 2-phenoxyethanol, its fork length and body weight were measured, and the section that the fish was caught in was recorded. To identify the predator animals, 3 cameras (Trophy Cam HD, Bushnell, Overland Park, KS, USA) were arranged in each section and placed at 10-m intervals along the riverside to monitor both sides of the stream, and the number of photos that were taken by camera traps (described in the section below) was counted for each section. In addition, to estimate the predation behavior of wild animals, the position of potential predators (at pool or riffle) in photos was recorded. Then, to investigate the position that predators utilized, the proportion of predators located around pools or riffles was calculated in each section, then the average proportions were compared.

#### Camera trap

To assess predator encounters during day and night, we recorded potential predators using motion and infrared sensor camera traps in the tank experiments and the semi-natural stream experiment. Each camera was mounted on a wooden stake so that the camera was about 50 cm above the water's surface. Cameras were triggered with a passive infrared motion sensor; the camera was set to wait 15 seconds after an initial trigger entered its sensor range before

attempting to detect additional triggers. To identify predators and estimate the frequency of their visits to the study site, all the photos containing potential predators were checked by KM. For some ambiguous species identifications, additional checking was performed by a local wildlife expert Dr. T. Takeda from Nikko National Park. When more than one potential predator was captured in a photo, the species and their number was recorded. In addition, the number of photos that showed predators capturing or eating fish was counted, and the predator species was recorded.

#### Statistical analyses

In the tank tests, Two-way ANOVA was used to determine the effects of study period and fish fork length on the survival rate of salmon. Additionally, a second set of ANOVA tests were used to determine how the number of salmon, and salmon size, effected the number of photos containing riparian predators in the stream test. One-way ANOVA was used to compare the average proportions of the predators located around pools and riffles in the stream. Data was  $\log(x + 0.5)$  transformed prior to analysis, or, when proportions were tested, data was  $\arcsin \sqrt{x}$  transformed. Tukey HSD test was used as a post-hoc test.

For the semi-natural stream experiment, Pearson's chi-square test was used to compare the proportion of the number of fish captured at each section. However, the omnibus chi-square value does not specify which combination of categories contributes to statistical significance;

thus, the adjusted standardized residuals (ASR) was used for each value to determine discrepancies between the observed and expected value (Haberman, 1973).  $|ASR| > 1.96$  and  $> 2.56$  show  $P < 0.05$  and  $P < 0.01$ , respectively. A  $P < 0.05$  was considered significant in all statistical analyses. Data analyses were generated using IBM SPSS software (version 21.0 of IBM SPSS Statistics for Windows).

## Results

### Tank experiment

In the tank experiment, cameras captured grey heron (*Ardea cinerea*), Japanese marten (*Martes melampus*), raccoon dog (*Nyctereutes procyonoides*), and large-billed crow (*Corvus macrorhynchos*). The total number of photos containing potential predators was 186 (including three photos with ambiguous species, which were identified by the local wildlife expert). A total of 173 photos of grey heron were taken and there were six photos or fewer of each of the other animals (Japanese marten: three times, raccoon dog: four times, large-billed crow: six times). Twenty one photos showed grey herons capturing prey fish. Therefore, in tank experiments, grey herons were regarded as the main predator.

With regard to the size-selective predation risk, both the length of the study period and the fork length of the stocked salmon had significant effects on the fish survival (Period,  $F_{2, 18} = 10.56$ ,  $P < 0.010$ ; Salmon length,  $F_{1, 18} = 36.67$ ,  $P < 0.001$ ; Period  $\times$  Salmon length,  $F_{2, 18} = 0.18$ ,

191  $P = 0.833$ ). The fish survival rate was significantly higher in the 75-100 mm FL-group than in  
192 the 135-160 mm FL-group during the study period (Tukey HSD test, all shows  $P < 0.050$ ) (Fig.  
193 2).

194 In the Two-way ANOVA test for frequency of predator appearance, only the number of  
195 fish in the tank had a significant effect on the number of photos containing grey herons (Number  
196 of fish,  $F_{2, 12} = 149.26$ ,  $P < 0.001$ ; Fork length,  $F_{1, 12} = 2.48$ ,  $P = 0.141$ ; Number of fish  $\times$  Fork  
197 length,  $F_{2, 12} = 0.02$ ,  $P = 0.981$ ) and the number of photos containing grey herons increased  
198 significantly when the number of fish in the tanks was large (Tukey HSD test, all shows  $P <$   
199  $0.001$ ) (Fig. 3). At the end of the three-day experiment, there were no surviving salmon.

200

## 201 Stream experiment

202 The overall survival rate of the fish in this experiment was 18.0% ( $n = 72$ ). The survival  
203 rate was significantly higher for the 75–100 mm FL-group (33.0%,  $n = 66$ ) than for the 135-160  
204 mm FL-group (3.0%,  $n = 6$ ) (Pearson's  $\chi^2$  test,  $\chi^2 = 60.98$ ,  $df = 1$ ,  $p < 0.001$ ).

205 There was no significant difference between the proportion of fish that survived in each  
206 section between both fish groups (Pearson's  $\chi^2$  test,  $\chi^2 = 0.77$ ,  $df = 3$ ,  $p = 0.86$ ). Comparing the  
207 actual proportion of surviving fish (75-100 and 135-160 mm) in each section to the expected  
208 surviving proportion (we hypothesized a uniform 1:1:1:1 ratio) showed there was a significant  
209 difference (Pearson's  $\chi^2$  test,  $\chi^2 = 15.43$ ,  $df = 3$ ,  $p < 0.001$ ). Accordingly, the number of fish

surviving in Sec. 2 was significantly higher than the average number of fish capture in each section ( $ASR = 3.4, p < 0.010$ ) (Fig. 4).

Cameras captured grey heron, brown dipper (*Cinclus pallasii*), Japanese red fox (*Vulpes vulpes japonica*) and large-billed crow during the predation test in the semi-natural stream. The total number of photos containing potential predators was 470. Among them, 455 contained grey heron. There were fewer than 10 photos of other animals (brown dipper: one times, Japanese red fox: seven times, large-billed crow: seven times). The most grey heron photos ( $n = 104$ ) were taken at Sec. 2 on day-5 (Fig. 5). 76.5 % of all pictures that contained grey heron were taken at Sec.2. Five photos had two grey herons in them, and two photos had three grey herons in them, all photos with multiple herons were taken in Sec. 2 between day-4 and day-7 after stocking. Seventeen photos showed grey herons capturing prey fish. Grey herons were most frequently photographed in the mornings and evenings.

In order to investigate the position that grey herons utilized, 412 photos were analyzed (455 minus 43 photos for undistinguishable positioning). The average proportion of photos showing grey heron around the pools ( $6.88 \pm 10.68\%$ ) (Fig. 1c) was significantly lower than those around the riffles ( $93.13 \pm 10.68\%$ ) (Fig. 1d) ( $F_{1,6} = 53.13, P < 0.010$ ) (Fig. 6). The overall proportions of photos taken of grey herons in the morning (3:00-9:00) and in the evening (15:00-21:00) were 49.3% ( $n = 224$ ) and 47.9% ( $n = 218$ ), respectively.

## 229 Discussion

230 In the 20-day stream experiment, we found that 82% of fish were taken and that grey  
231 heron was the most frequently visiting predator. It has been previously reported that salmonid  
232 populations can be seriously damaged by avian predation, (Feltham 1995; Stewart et al.2005),  
233 but there have been no quantitative assessments of the impact of grey heron on river fisheries  
234 (Harris et al. 2008). Our results suggest that at least in our experimental settings, grey herons can  
235 significantly reduce salmonid populations by consuming juvenile fish. On the other hand, it is  
236 important to note that water depth can strongly influence wading birds' selection of foraging  
237 habitat (Master et al. 2005, Gawlik and Crozier 2007). The length of a grey heron's legs restricts  
238 the maximum depth at which they can forage up to 16 cm deep (Ntiamoa-Baidu et al. 1998),  
239 thereby limiting the habitat suitable for hunting. Our observation that grey herons showed a  
240 significant preference for the riffle, rather than the pool, in the semi-natural stream is consistent  
241 with previous studies. Thus, where local salmonids reside in shallow water, it is reasonable to  
242 expect that grey herons exert a high predation pressure.

243 On the first day of the tank experiments, grey herons preyed upon large salmon more  
244 often than upon small salmon. In both the tank and the stream experiments, the survival rate of  
245 large salmon was less than that of small salmon. Birds of the heron family (Ardeidae) including  
246 the grey heron are reported to show a preference for larger mosquito fish *Gambusia affinis*  
247 (Britton and Moser 1982) and sailfin molly *Poecilia latipinna* (Trexler et al., 1994) as prey. It is

suggested that larger fish are easier for avian predators to detect than small ones (Eriksson 1985, Magnhagen 1988). After the second day of the tank experiment, however, both sizes of salmon showed similar levels of decline on their survival rate. One possible explanation for this result is the decreased opportunities to prey upon larger fish. Our results suggest that size-selective predation by grey herons depends on the density of preferred prey size, and it appears that size-selective predation occurred in the stream experiment as well as in the tank experiments. Therefore, if fish with different body sizes are stocked in rivers, it might be important to consider how size composition will potentially influence the behavior of predators.

It is established that larger fish are safer from fish-on-fish predation than smaller fish (Peterson and Wroblewski 1984, Houde 1987, Miller et al. 1988, Miyamoto and Araki 2017). One potential cause for the higher survival rate of larger fish is improved swimming ability that allows them to better avoid predators as they grow (Beamish 1978; Lundvall et al. 1999). However, the grey heron is an ambush predator that usually stands upright and waits for a fish to approach (Tojo, 1996), so the swimming ability that a fish possesses to avoid aquatic predators has significantly limited benefits to them in this case (Miyamoto 2016b), and large size might make fish more detectable. Therefore, to decrease predation risk by wild animals, we suggest that hatchery managers choose an optimum body size of released fish based on the predator species inhabiting the stocking area. Additionally, to block the vision of grey herons or prevent access, it can be recommended to stock fish in a structurally complex place that has a lot of woody debris

267 and/or big rocks if many grey herons are around during the stocking season.

268 Generally, in salmonids, larger individuals avoid exposure to a predatory threat and  
269 reduce growth rate, whereas smaller individuals are less cautious and maintain their growth rate  
270 even in the presence of a threat (Reinhardt 1999). Based on this behavior, it is expected that the  
271 OYO salmon are more difficult for grey heron to catch than the YOY salmon. In contrast to this,  
272 it was also reported that the hatchery environment selects for bolder individuals that spend more  
273 time in open areas and are more active than wild specimens (Sundström et al., 2004). So, OYO  
274 salmon that spent a longer time than the YOY salmon in the hatchery may display a higher  
275 tendency for bold behavior (Roberts et al 2014). Thus, to fully understand the predation risks for  
276 stocked salmon, further studies that estimate the individual behavior of fish (e.g. bold and shy)  
277 and improve the maladapted behavior of fish (Berejikian et al 1999, Roberts et al 2011) will be  
278 needed.

279 In the tank experiment where different numbers of salmon were stocked, the number of  
280 grey herons present or the duration of their sojourn at the tanks was positively correlated to the  
281 number of stocked fish. In other studies, large numbers of fish have been observed to remain  
282 close to where they were stocked (Cresswell 1981), and piscivorous water birds have displayed  
283 similar density and temporal trends in response to stocking (Gawlik 2002; Draulans 1987). This  
284 suggests that for the duration of our stream experiment many salmon stayed in Sec. 2, as multiple  
285 grey herons simultaneously appeared frequently in that section. We also captured more fish in

Sec. 2 by electrofishing than in any other sections on the final day of the stream experiment.

These results indicate that most stocked fish gathered without migrating from the initial stocking site and continued to be preyed upon there. This situation may have serious implications for the conservation and propagation of salmonids and it is important to further investigate the spatial and temporal relationships between salmonids and their predators.

The great cormorant (*Phalacrocorax carbo*) is a type of piscivorous water bird, whose predation on stocked fish became a serious problem, just after the fish were released (Kumada et al. 2013). In this study, the grey herons appeared only two days after the fish were released, then the number of photos rapidly increased for a few days indicating increased predation, or higher predator abundance. This suggests that grey herons exerted the strongest predation pressure soon after stocking. To solve this problem, it is important to stock the fish in a safe place and allocate as much time as possible for them to acclimate to the surrounding environment. The results of this study showed that the grey heron has a tendency to avoid deep water and foraging in the middle of day and night. In contrast, it previously was reported that grey herons forage constantly during the daytime (Richner 1986; Sawara et al 1990), so human activities (Klein, 1993) and other feeding sites (Richner 1986) in the surrounding environment could have had an effect on the observed behavior. Grey herons infrequently forage at night, and it has been suggested that such feeding behavior is inefficient (Sawara et al 1990). Therefore, to decrease the predation pressure of grey herons, it might be wise to stock fish in a deep area, or at night

(Roberts et al 2009), or both. In this way, if we can develop techniques to mitigate predatory damage to fisheries by investigating the relationship between stocked fish and predatory animals, it will not only help the conservation and propagation of stocked fish, but also support the conservation of wild animals as well.

309

### Acknowledgements

We would like to thank Kouji Mutou, Hidefumi Nakamura and Masaharu Murakami of the National Research Institute of Fisheries Science for their help with the care of the fish. We thank Dr Tsutomu Takeda of Nikko Yumoto Visitor Center of Nikko National Park for his help with the identification of wildlife. We are grateful to Predrag Davidovic and Petar Ilic for critically reading the manuscript and providing valuable comments. This work was supported by JSPS KAKENHI Grant Number JP26292102.

317

### References

- Beamish, F.W.H. 1978. Swimming capacity. *In* Fish physiology, Vol. VII. *Edited by* W. S. Hoar and D.J. Randall. Academic Press, New York. pp. 101–187.
- Brown, C., and Laland K.N. 2003. Social learning in fishes: a review. *Fish Fish.* **4**: 280-288.
- Berejikian, B.A., Smith, R.J.F., Tezak, E.P., Schroder, S.L., and Knudsen, C.M. 1999. Chemical alarm signals and complex hatchery rearing habitats affect antipredator behavior and

- 324 survival of chinook salmon (*Oncorhynchus tshawytscha*) juveniles. Can. J. Fish. Aquat. Sci. **56**:  
325 830–838.
- 326 Carss, D.N., and Marquiss, M. 1991. Avian predation at farmed and natural fisheries. In  
327 Interaction between fisheries and environment. Edited by M.C. Lucas, I. Diak, and L. Laird.  
328 Proc. Institute of Fisheries Management, 22nd Annual Study Course. University of Aberdeen.  
329 University of Aberdeen. UK. pp 179–196.
- 330 Collis, K., Roby, D.D., Craig, D.P., Adamany, S., Adkins, J.Y., and Lyons, D.E. 2002. Colony  
331 size and diet composition of piscivorous waterbirds on the lower. Columbia River: Implications  
332 for losses of juvenile salmonids to avian predation. T. Am. Fish. Soc. **131**: 537–550.
- 333 Cresswell, R.C. 1981. Post - stocking movements and recapture of hatchery - reared trout  
334 released into flowing waters—a review. J. Fish Biol. **18**(4): 429–442.
- 335 Dill, L.M., and Fraser, A.H.G. 1984. Risk of predation and the feeding behavior of juvenile  
336 coho salmon (*Oncorhynchus kisutch*). Behav. Ecol. Sociobiol. **16**: 65–71.
- 337 Draulans, D. 1987. The effect of prey density on foraging behaviour and success of adult and  
338 first-year grey herons (*Ardea cinerea*). J. Anim. Ecol., 479–493.
- 339 Eriksson, M.O. 1985. Prey detectability for fish-eating birds in relation to fish density and  
340 water transparency. Ornith. Scand. **16**: 1–7.
- 341 Feltham, M.J. 1995. Consumption of Atlantic salmon smolts and parr by goosanders: estimates  
342 from doubly - labelled water measurements of captive birds released on two Scottish rivers. J.

343 Fish Biol. **46**: 273–281.

344 Fraser, D.J. 2008. How well can captive breeding programs conserve biodiversity? A review of  
345 salmonids. *Evol. Appl.* **1**: 535–586.

346 Frechette, D., Osterback, A.M.K., Hayes, S.A., Moore, J.W., Shaffer, S.A., Pavelka, M.,  
347 Winchell, C., and Harvey, J. T. 2015. Assessing the Relationship between Gulls *Larus* spp. and  
348 Pacific Salmon in Central California Using Radiotelemetry. *N. Am. J. Fish. Manage.* **35**(4):  
349 775–788.

350 Gawlik, D.E. 2002. The effects of prey availability on the numerical response of wading birds.  
351 *Ecol. Monogr.* **72**(3): 329–346.

352 Harris, C.M., Calladine, J.R., Wernham, C.V., and Park, K.J. 2008. Impacts of piscivorous  
353 birds on salmonid populations and game fisheries in Scotland: a review. *Wildlife Biol.* **14**(4):  
354 395–411.

355 Henschel, P., and Ray, J. 2003 *Leopards in African Rainforests: Survey and Monitoring*  
356 *Techniques*. Wildlife Conservation Society, New York, NY.

357 Harvey, B.C., and R. J. Nakamoto, 2013. Seasonal and Among-Stream Variation in Predator  
358 Encounter Rates for Fish Prey. *T. Am. Fish. Soc.* **142**: 621–627.

359 Houde, E.D. 1987. Fish early life dynamics and recruitment variability. *Am. Fish. Soc. Symp.*  
360 **2**: 17–29.

361 Klein, M.L. 1993. Waterbird behavioral responses to human disturbances. *Wildlife Soc. B.* **21**:

31–39.

Kruuk, H. 1995. Wild Otters. Predation and populations. Oxford University Press. New York.

Kumada, N., Arima, T., Tsuboi, J., Ashizawa, A., and Fujioka, M. 2013. The multi-scale aggregative response of cormorants to the mass stocking of fish in rivers. *Fish. Res.* **137**: 81–87.

Kushlan, J.A. 1976. Wading bird predation in a seasonally fluctuating pond. *Auk* **93**: 464–476.

Lundvall, D., Svanbäck, R., Persson, L., and Byström, P. 1999. Size-dependent predation in piscivores: interactions between predator foraging and prey avoidance abilities. *Can. J. Fish. Aquat. Sci.* **56**: 1285–1292.

Magnhagen, C. 1988. Predation risk and foraging in juvenile pink (*Oncorhynchus gorbuscha*) and chum salmon (*O. keta*). *Can. J. Fish. Aquat. Sci.* **45**(4): 592–596.

Martel, G., and Dill, L.M. 1995. Influence of movement by coho salmon (*Oncorhynchus kisutch*) parr on their detection by common mergansers (*Mergus merganser*). *Ethology* **99**: 139–149.

Master, T.I., Lesier, J.K. Bennett, K.A. Bretsch, J.K., and Wolfe H.J. 2005. Patch selection by Snowy Egrets. *Colon. Waterbird.* **28**: 220–224.

Miller, T.J., Crowder, L.B., Rice, J.A., and Marschall, E.A. 1988. Larval size and recruitment mechanism in fisheries: toward a conceptual framework. *Can. J. Fish. Aquat. Sci.* **45**: 1657–1670.

Miyamoto, K. 2016a. Effect of visual and chemical stimuli on predator avoidance behavior in juvenile masu salmon *Oncorhynchus masou*. *Aquacul. Sci.* **64**: 43–51.

381 Miyamoto, K. 2016b. Effects of body color luminance and behavioral characteristics on  
382 predation risk in salmonid fishes. *Hydrobiologia*, **783**: 249–256.

383 Miyamoto, K., and Araki, H. 2017. Differentiated predation risk on hatchery-reared juvenile  
384 masu salmon by white-spotted charr with different body sizes. *Fish. Sci.* doi:  
385 10.1007/s12562-016-1059-8

386 Ntiamoa-Baidu Y., Piersma, T., Wiersma, P., Poot, M., Battley, P., and Gordon, C. 1998. Water  
387 depth selection, daily feeding routines and diets of waterbirds in coastal lagoons in Ghana. *Ibis*.  
388 **140**(1): 89–103.

389 Osterback, A.M.K., Frechette, D. M., Shelton, A. O., Hayes, S. A., Bond, M. H., Shaffer S. A.,  
390 and Moore, J. W. 2013. High predation on small populations: avian predation on imperiled  
391 salmonids. *Ecosphere* **4**(9): 116.

392 Peterson, I., and Wroblewski, J.S. 1984. Mortality rate of fishes in the pelagic ecosystem. *Can.*  
393 *J. Fish. Aquat. Sci.* **41**(7): 1117–1120.

394 Reinhardt, U.G. 1999. Predation risk breaks size-dependent dominance in juvenile coho  
395 salmon (*Oncorhynchus kisutch*) and provides growth opportunities for risk-prone individuals.  
396 *Can. J. Fish. Aquat. Sci.* **56**(7): 1206–1212.

397 Richner, H. 1986. Winter feeding strategies of individually marked herons. *Anim. Behav.* **34**:  
398 881–886.

399 Roberts, L.J., Taylor, J., Gough, P.J., Forman, D.W., and de Garcia de Leaniz, C., 2009. Night stocking facilitates nocturnal migration of hatchery - reared Atlantic salmon, *Salmo salar*,

400 smolts. Fisheries Manag. Ecol. **16**: 10–13.

401 Roberts, L.J., and Garcia de Leaniz, C. 2011. Something smells fishy: predator-naïve salmon  
402 use diet cues, not kairomones, to recognize a sympatric mammalian predator. Anim. Behav. **82**:  
403 619–625.

404 Roberts, L.J., Taylor J., and Garcia de Leaniz, C., 2011. Environmental enrichment reduces  
405 maladaptive risk-taking behavior in salmon reared for conservation. Biol. Conserv. **144**:  
406 1972–1979.

407 Roberts, L.J., Taylor, J., Gough, P.J., Forman, D.W., and Garcia de Leaniz, C. 2014. Silver  
408 spoons in the rough: can environmental enrichment improve survival of hatchery Atlantic salmon  
409 *Salmo salar* in the wild? J. Fish Biol. **85**: 1972–1991.

410 Roby, D.D., Lyons, D.E., Craig, D.P., Collis, K., and Visser, G.H. 2003. Quantifying the effect  
411 of predators on endangered species using a bioenergetics approach: Caspian terns and juvenile  
412 salmonids in the Columbia River estuary. Can. J. Zool. **81**: 250–265.

413 Penaluna, B.E., Jason, B.D., and Noakes, D.L. 2015. Instream cover and shade mediate avian  
414 predation on trout in semi-natural streams. Ecol. Freshw. Fish **25**: 405–411.

415 Post, J.R., Parkinson, E.A., and Johnston, N.T. 1998. Spatial and temporal variation in risk to  
416 piscivory of age-0 rainbow trout: patterns and population level consequences. T. Am. Fish. Soc.  
417 **127**: 932–942.

418 Salvanes, A.G.V., and Braithwaite, V. 2006. The need to understand the behaviour of fish

reared for mariculture or restocking. ICES J. Mar. Sci. **63**: 346–354.

Sawara, Y., Azuma, N., Fukui, K., Demachi, G., and Sakuyama, M. 1990. Feeding activity of the Grey Heron *Ardea cinerea* in tidal and non-tidal environments. Jap. J. Ornithol. **39**: 45–52.

Silveira, L., Jacomo, A.T.A., and Diniz-Filho, J.A.F. 2003. Camera trap, line transect census and track surveys: a comparative evaluation. Biol. Conserv. **114**: 351–355.

Steinmetz, J., Kohler, S.L., and Soluk, D.A. 2003. Birds are overlooked top predators in aquatic food webs. Ecology **84**: 1324–1328.

Sundström, L.F., Petersson, E., Höjesjö, J., Johnsson, J.I., and Järvi, T. 2004. Hatchery selection promotes boldness in newly hatched brown trout (*Salmo trutta*): implications for dominance. Behav. Ecol. **15**(2): 192–198.

Stewart, D.C., Middlemas, S.J., Gardiner, W.R., Mackay, S., and Armstrong, J.D. 2005. Diet and prey selection of cormorants (*Phalacrocorax carbo*) at Loch Leven, a major stocked trout fishery. J. Zool. **267**: 191–201.

Tojo, H. 1996. Habitat Selection, Foraging Behavior and Prey of Five Heron Species in Japan. Jap. J. Ornithol. **45**: 141–158.

Wegge, P., Pokheral, G.P., and Jnawali, S.R. 2004. Effects of trapping effort and trap shyness on estimates of tiger abundance from camera trap studies. Anim. Conserv. **7**: 251–256.

Wood, C.C. 1987. Predation on juvenile Pacific salmon by the common merganser (*Mergus merganser*) on eastern Vancouver Island I: Predation during the seaward migration. Can. J. Fish.

438 Aquat. Sci. **44**: 941–949.

Draft

1 Figure captions

2

3 **Fig. 1.** a and b: outdoor FRP circular tank (a) and semi-natural stream (b) at NRIFS in  
 4 Nikko. c and d: examples of photo of grey heron in the pool (c) and in the riffle (d) in  
 5 the semi-natural stream.

6

7 **Fig. 2.** Survival rate of masu salmon (*Oncorhynchus masou*) with different body sizes  
 8 in outdoor tanks.

9

10 **Fig. 3.** Correlation between the number of taken photos of grey heron (*Ardea cinerea*)  
 11 and the number of masu salmon (*Oncorhynchus masou*) in outdoor tanks.

12

13 **Fig. 4.** The sum of masu salmon (*Oncorhynchus masou*), 75–100 and 135–160 mm,  
 14 captured at the each section in the semi-natural stream. Broken line indicates the  
 15 expected surviving proportion (we hypothesized a uniform 1:1:1:1 ratio). Asterisk  
 16 denotes a significant deviation from the average value (\*\*  $p < 0.010$ ). Each section  
 17 (Sec.) was named from the upper most section in the stream, Sec. 1, Sec. 2, Sec. 3 and  
 18 Sec. 4, Sec. 2 was the stocking location.

19

20 **Fig. 5.** Number of photos of grey heron (*Ardea cinerea*) in each study section of  
21 semi-natural stream.

22

23 **Fig. 6.** The proportion of the photos that showed grey heron located around the pool  
24 or riffle in each study section of the semi-natural stream. Asterisk denotes a significant  
25 difference (\*  $p < 0.050$ , \*\*  $p < 0.010$ ).

Draft

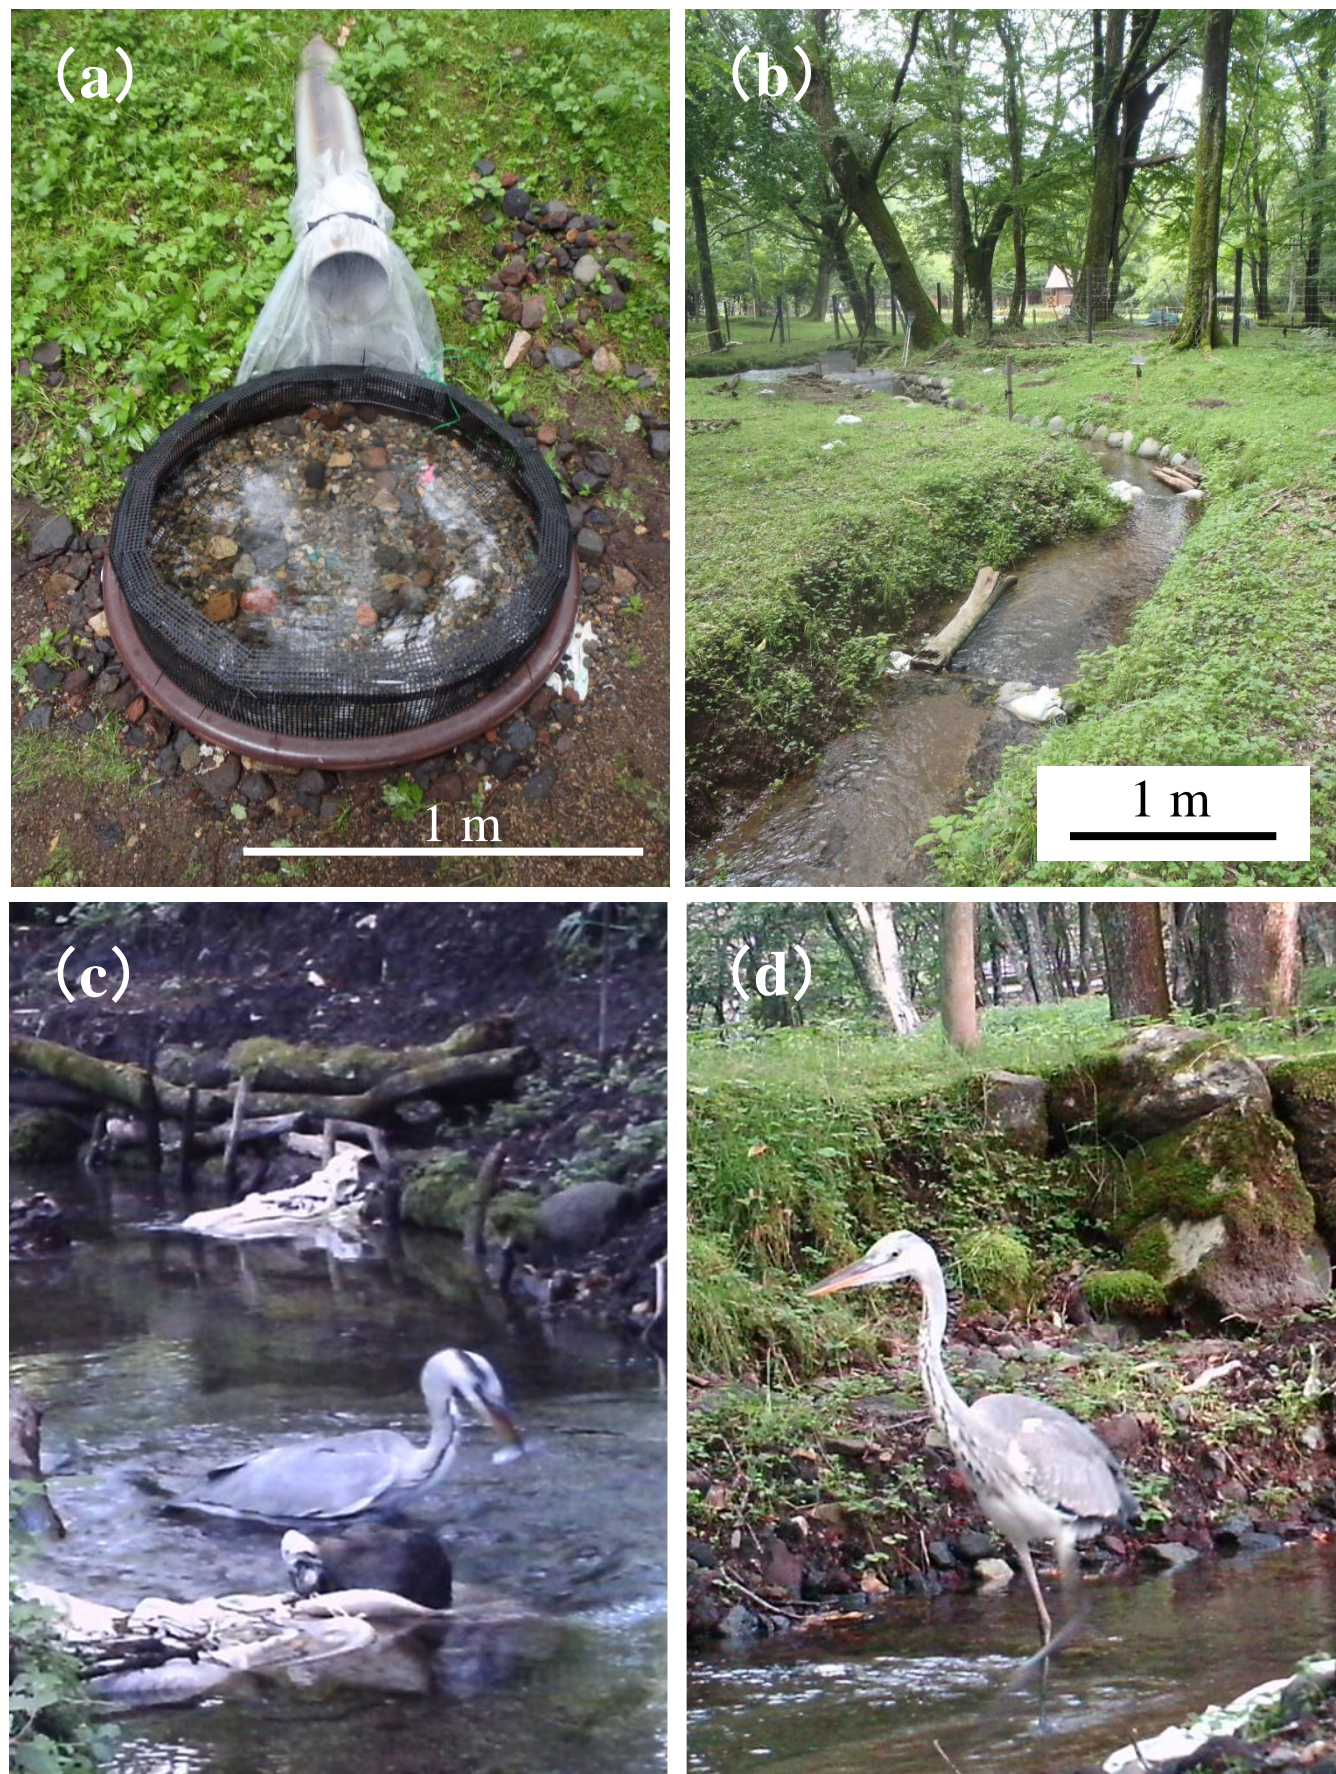

Fig.1

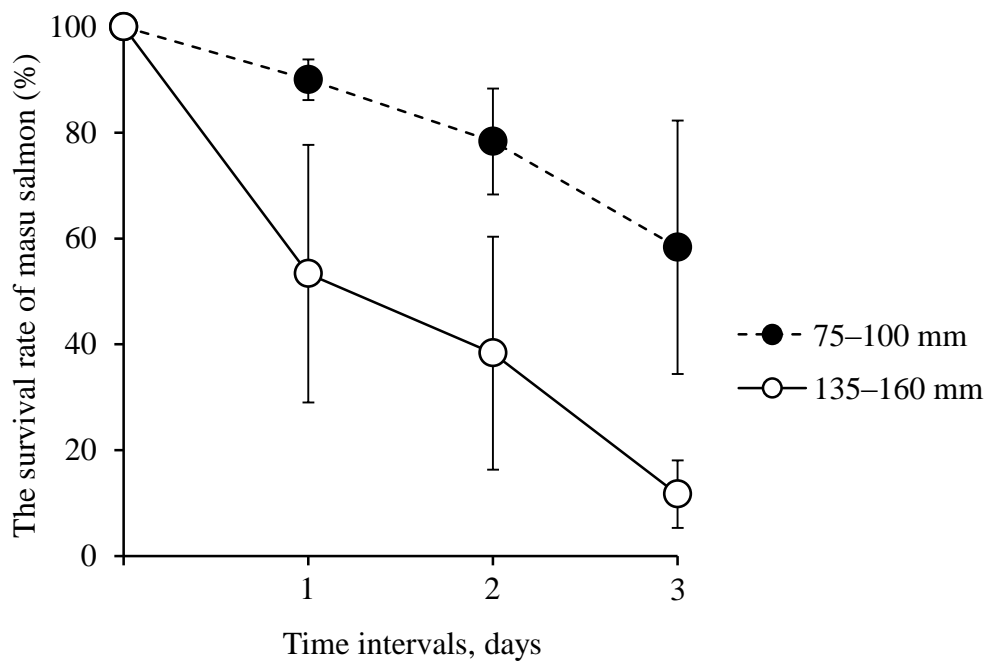

Fig.2

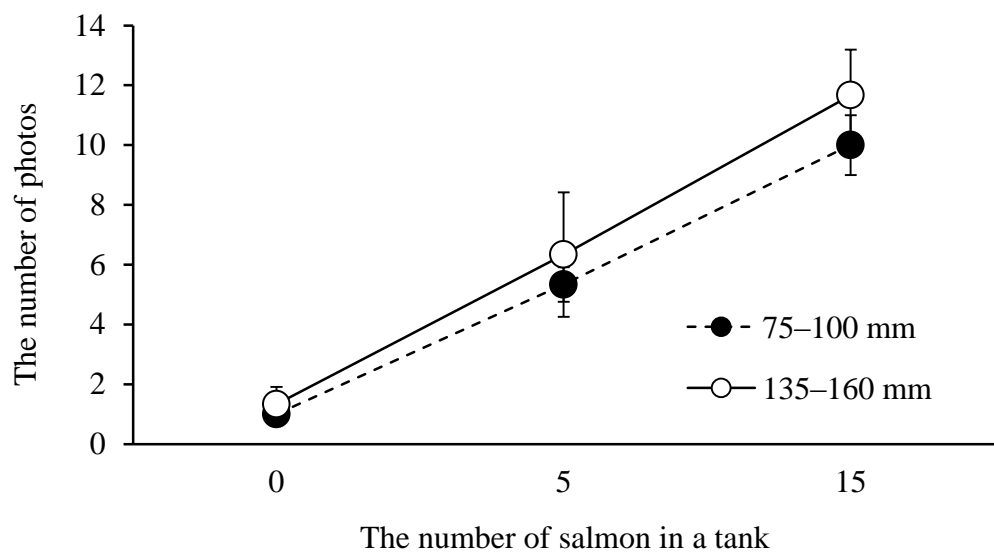

Fig.3

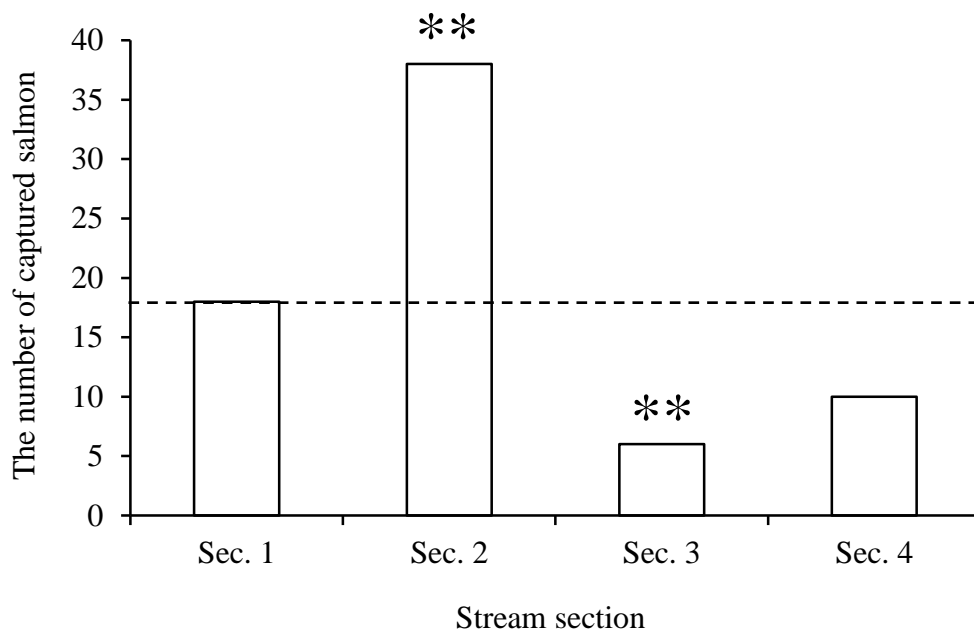

Fig.4

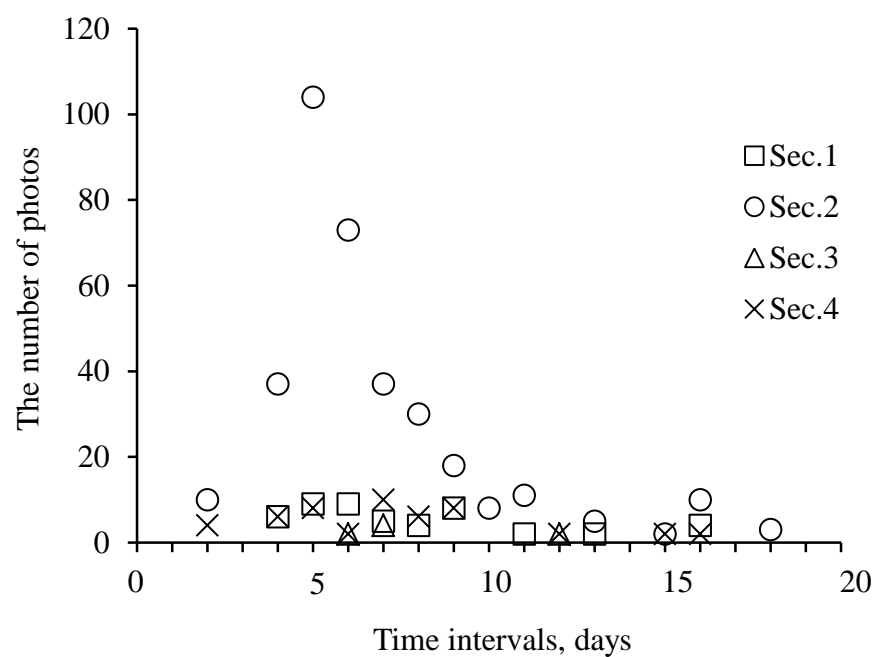

Fig.5

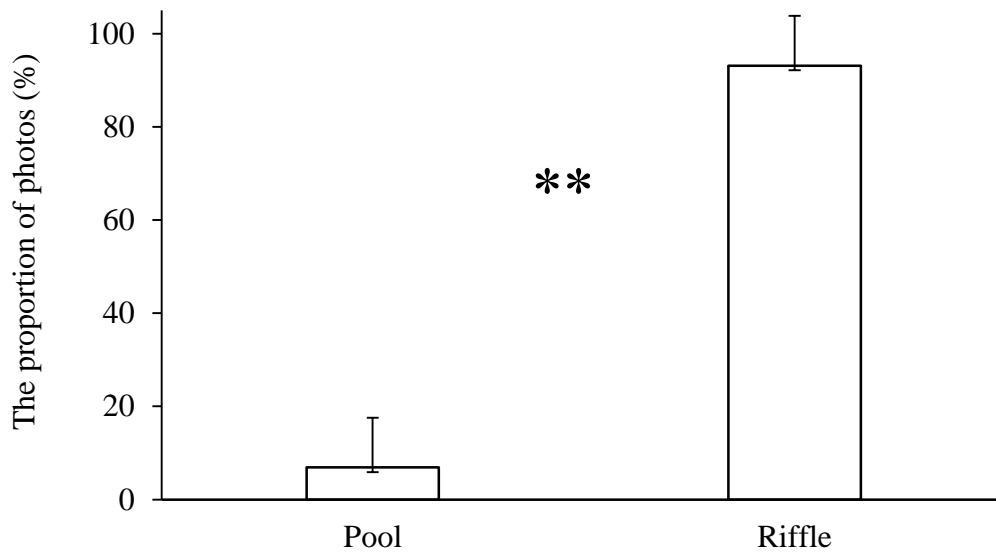

Source: http://biorxiv.org/content/10.1101/127472v1.full.pdf
